# Supplementary material for: Narrative Review: Bioactive Potential of Various Mushrooms as the Treasure of Versatile Therapeutic Natural Product
Source: MDPI journal article supplement (doi:10.3390/jof7090728), 2021-09-06
Supplement: s1 [file s1]

**Table S1.** Name and a molecular formula of constituent compounds of APH (hexane crude extract of *Auricularia polytricha*).

| Compound | Name                                 | Molecular formula                               |
|----------|--------------------------------------|-------------------------------------------------|
| F1A      | Linoleoyl, oleoyl, palmitoylglycerol | C <sub>55</sub> H <sub>100</sub> O <sub>6</sub> |
| F1B      | Linoleoyl, oleoyl, stearoylglycerol  | C <sub>57</sub> H <sub>104</sub> O <sub>6</sub> |
| F2       | Distearoyl, palmitoylglycerol        | C <sub>55</sub> H <sub>106</sub> O <sub>6</sub> |
| F3       | Linoleic acid                        | C <sub>18</sub> H <sub>32</sub> O <sub>2</sub>  |
| F4       | Ergosterol                           | C <sub>28</sub> H <sub>44</sub> O               |
